# Supplementary material for: Breast organoid suspension cultures maintain long-term estrogen receptor expression and responsiveness
Source: NPJ Breast Cancer. 2024 Dec 19;10:107. doi: 10.1038/s41523-024-00714-7 (PMC11659324; doi:10.1038/s41523-024-00714-7)
Supplement: Supplementary file 3 — Supplementary Table 3 [file 41523_2024_714_MOESM3_ESM.xlsx]

## Sheet: Heatmap data (5)
Name	STC2	TFF3	AGR2	AGR3	TFF1	TCIM	PTHLH	ANKRD30A	BATF	SYTL2	TMC5	SCUBE2	DIO2	TBX3	FBP1	ACADSB	AFF3	SLC7A2	MLPH	TSPAN5	AR	CAPN8	FOXA1	TMEM45B	ELOVL5	FTO	INPP4B	SLC40A1	NQO1	SLC39A6	TTC39A	MISP	LYPD6B	VSIG2	RASEF	GPR160	MAGED2	PKIB	SMIM14	EFHD1	TOX3	PGM2L1	FASN	TSPAN15	MUCL1	CA12	CMBL	SUSD3	IRS1
ORG6HS_7d-1	0.615287	1.55942	1.61175	1.25429	1.05695	0.229742	-0.290057	1.15569	1.13631	0.767441	1.01155	2.03028	-0.257876	1.79038	1.68772	0.980272	2.18787	1.08939	0.933725	0.708494	1.37183	0.34151	1.40989	0.273906	1.35703	0.401597	1.15161	0.909281	-0.0893235	1.25837	0.307781	0.831653	1.41031	3.21701	1.03329	1.23275	1.43937	-0.229658	0.612107	1.11389	0.636619	0.759966	1.84127	1.51754	1.30926	1.19403	0.807299	1.94578	-0.205352
ORG6HS_7d-2	-0.294611	0.318178	0.0220673	-0.526921	-0.444629	-0.439382	1.33907	0.644531	0.56036	0.737349	0.401591	0.0563322	-0.324535	-0.356304	1.13974	-0.116396	-0.038682	0.248861	0.901164	0.666142	0.760691	1.49704	0.644588	2.06885	1.05083	-0.790888	0.0928231	1.15854	1.75829	0.347859	0.842091	0.853593	0.649436	-0.103791	0.55985	0.776278	0.382001	0.519169	1.20434	0.493285	1.38124	0.67228	0.715191	0.182315	0.90986	1.05734	0.623332	-0.0235262	-0.407969
ORG6HS_7d-3	2.32495	0.24259	1.03348	2.06248	1.95042	3.35825	-0.450066	1.99074	1.08853	0.158872	1.03581	0.545869	3.59254	1.75829	0.98339	2.39129	1.0227	0.855586	0.899456	0.964275	0.729516	0.673094	1.37659	0.247187	0.698767	0.145312	1.53526	0.530912	-0.298577	0.419916	0.434697	0.756047	0.834237	0.0658277	1.5189	0.527177	0.719623	0.174178	0.376133	1.8558	0.974072	1.59754	0.871801	0.613428	0.296785	0.911359	0.152697	2.27577	0.872628
ORG6HS_0d-1	-0.169927	1.08084	0.809416	-0.419571	-0.441607	-0.418578	1.94631	0.224165	0.686118	0.886116	0.522071	1.41479	-0.31465	-0.353089	0.768416	-0.096615	0.242706	0.427387	1.39914	1.25293	0.706148	1.65189	0.867158	1.47273	0.883567	-0.265224	0.204419	1.12139	2.06249	-0.0865393	2.09151	1.19752	1.12496	0.412284	0.452538	1.30636	1.42252	2.43607	1.56076	0.8643	1.38008	-0.361891	0.934572	0.627226	0.721741	0.873159	1.57795	0.168583	0.619631
ORG6HS_0d-2	-0.50745	0.839401	0.602786	-0.440251	-0.310455	-0.422768	1.83442	-0.0999907	0.815644	1.44246	0.408643	0.270353	-0.255401	-0.364316	0.801958	-0.119327	-0.0843827	1.02926	0.944015	1.01939	0.470774	1.55454	0.744077	1.45528	0.753662	-0.624435	0.0643622	1.26053	1.73485	-0.0592623	1.73313	1.16502	0.501683	-0.20204	0.306155	1.25022	0.841051	1.66297	1.61536	0.78052	1.4274	0.405492	0.766019	0.431768	0.447859	0.707548	1.30321	-0.0133546	0.283291
ORG6HS_0d-3	1.04105	1.14919	0.578652	-0.233545	2.11735	0.124368	-0.568572	0.467061	0.36292	0.928335	0.97785	0.369168	-0.0152563	1.54132	0.209258	1.52672	0.567698	1.6676	0.902309	1.4852	0.910988	0.665931	0.837944	0.108317	0.520236	-0.384729	-0.281187	0.840058	-0.36841	0.913089	0.643819	0.826331	1.56819	-0.157926	1.0469	0.620662	0.828516	0.395172	0.421009	0.937594	0.394056	1.30931	0.3182	1.1521	-0.218645	1.18587	1.43931	-0.281971	1.06486
ORG6HS_0d-4	1.88692	1.5662	1.89452	2.32737	0.995947	0.862701	0.809709	1.79344	2.05368	1.68823	2.18628	0.916106	-0.188359	1.207	1.28848	0.885974	1.88957	1.33637	1.16931	0.915793	1.8652	0.238495	1.1821	0.615676	1.62798	1.33654	1.6185	1.27152	0.334453	2.05784	0.311747	1.44701	0.828639	1.03379	1.68828	1.2825	1.29128	-0.374237	0.980712	0.867272	0.692053	1.63633	1.38072	1.74039	2.479	1.20327	0.142552	1.19375	-0.0454469
ORG6LASP_0d-1	-0.369127	-0.631711	-0.73667	-0.422254	-0.364105	-0.355251	-0.592046	-0.64913	-0.579692	-0.0690411	-0.416631	-1.05517	-0.292993	-0.424015	-0.714871	-0.248556	-0.643175	-0.105372	-0.639867	-0.394218	-0.485804	-0.602507	-0.67397	-0.621449	-0.724146	-1.01951	-1.14125	-0.631568	-0.634454	-1.36865	-0.590606	-0.519158	-0.741928	-0.522048	-0.343465	-0.544373	-0.675242	0.511741	-0.638627	-0.586642	-0.442744	-0.21678	-0.764984	-0.374516	-0.700647	-0.626993	-0.478954	-0.663139	-0.655201
ORG6LASP_0d-2	-0.746726	-0.889104	-0.758145	-0.42808	-0.66946	-0.418172	-0.791799	-0.781529	-0.854179	-0.772555	-0.868098	-1.15902	-0.367687	-0.744458	-0.850748	-0.547629	-0.752809	-0.935715	-0.905155	-0.917476	-0.921614	-0.867477	-0.923827	-0.803984	-0.61293	-0.793348	-1.07423	-0.919166	-0.590308	-0.872049	-0.828012	-1.01921	-0.919115	-0.468976	-0.731799	-0.790566	-0.777408	-0.442031	-0.783531	-0.911904	-0.982865	-1.1681	-0.832296	0.0064549	-0.677275	-0.852382	-1.3299	-0.786183	-0.511974
ORG6LASP_0d-3	-0.560483	-0.841604	-0.766325	-0.439489	-0.582464	-0.380882	-0.937506	-0.721587	-0.748173	-0.66564	-0.722182	-1.13832	-0.324321	-0.632009	-0.810398	-0.417201	-0.636449	-0.69454	-0.833948	-0.765255	-0.781793	-0.832986	-0.81562	-0.729206	-0.4781	-0.527846	-1.02595	-0.807245	-0.647785	-0.692473	-0.75806	-0.824501	-0.842186	-0.467299	-0.591098	-0.795361	-0.898872	-0.31095	-0.691312	-0.773408	-0.767405	-0.755985	-0.768577	-0.511138	-0.625177	-0.739258	-1.37142	-0.594808	-0.401806
ORG6LASP_0d-4	-0.376993	-0.906317	-0.861393	-0.552242	-0.657259	-0.407966	-0.896686	-0.820377	-0.852867	-0.97078	-0.912321	-1.19649	-0.334881	-0.723688	-0.893211	-0.718907	-0.765918	-0.986465	-0.927541	-0.983756	-0.936075	-0.890957	-0.937798	-0.797245	-1.0245	-1.05322	-1.24714	-0.95116	-0.666967	-1.79488	-0.838437	-0.922363	-1.12292	-0.586462	-0.605498	-0.889746	-1.10418	-0.365084	-0.960692	-0.919739	-0.874161	-0.862715	-0.962224	-0.800361	-0.825463	-1.00954	-0.938393	-0.617815	-0.882883
ORG6BA_0d-1	-0.725715	-0.859138	-0.871554	-0.55594	-0.596294	-0.436027	-0.676416	-0.789835	-0.910958	-1.0795	-0.885199	0.560236	-0.159576	-0.695435	-0.904578	-0.808838	-0.738095	-0.95177	-0.94144	-1.09927	-0.902274	-0.831134	-0.907025	-0.814937	-1.10216	2.13294	0.407163	-0.935832	-0.688211	-0.740849	-0.824561	-0.941035	-1.01307	-0.598229	-1.08612	-0.964284	-0.848435	-1.01221	-0.924178	-0.904397	-0.967034	-0.874864	-0.901005	-1.19031	-0.781442	-1.04182	-0.244298	-0.742776	-0.98258
ORG6BA_0d-2	-0.570087	-0.906317	-0.888904	-0.5901	-0.680515	-0.428567	0.171251	-0.813406	-0.958711	-1.09101	-0.936964	-0.723368	-0.366831	-0.631833	-0.925188	-0.856777	-0.774498	-1.00842	-0.981465	-0.964087	-0.951119	-0.881126	-0.951993	-0.826829	-1.01936	-0.595672	1.13564	-0.983473	-0.640083	0.0955846	-0.846107	-0.886243	-1.01383	-0.706933	-1.11305	-1.03114	-1.05996	-0.922356	-1.00719	-0.977414	-0.965217	-0.0286722	-0.85239	-1.28416	-0.829702	-0.890483	0.0382525	-0.609968	2.30454
ORG6BA_0d-3	-0.767272	-0.88159	-0.85408	-0.538946	-0.68091	-0.435924	-0.793743	-0.791499	-0.851449	-0.96975	-0.911355	-0.212315	-0.348944	-0.635152	-0.878895	-0.991464	-0.727243	-1.00622	-0.954052	-0.944583	-0.906654	-0.87014	-0.920241	-0.821664	-0.959955	0.403271	-0.778956	-0.942899	-0.633503	0.187907	-0.836873	-0.96931	-0.5573	-0.462763	-1.07412	-1.00337	-0.905748	-0.988217	-0.897305	-0.927722	-0.967133	-0.994431	-0.793522	-1.14418	-0.749461	-0.974798	-0.440323	-0.591185	0.692307
ORG6BA_0d-4	-0.779816	-0.840047	-0.815604	-0.496799	-0.692975	-0.431547	-0.10386	-0.808271	-0.947532	-0.990533	-0.891038	-0.678446	-0.0412358	-0.736681	-0.901064	-0.862549	-0.749291	-0.965945	-0.965655	-0.943574	-0.92981	-0.846171	-0.93187	-0.826638	-0.970913	1.63521	-0.661064	-0.920894	-0.632461	0.334141	-0.842116	-0.995352	-0.707116	-0.452447	-1.06077	-0.977103	-0.65452	-1.05456	-0.867583	-0.911438	-0.918965	-1.11748	-0.952776	-0.966555	-0.756694	-0.997311	-1.28131	-0.65916	-1.74405
[truncated: 206 more columns]
