# Supplementary material for: Breast organoid suspension cultures maintain long-term estrogen receptor expression and responsiveness
Source: NPJ Breast Cancer. 2024 Dec 19;10:107. doi: 10.1038/s41523-024-00714-7 (PMC11659324; doi:10.1038/s41523-024-00714-7)
Supplement: Supplementary file 4 — Supplementary Table 4 [file 41523_2024_714_MOESM4_ESM.xlsx]

## Sheet: Heatmap data (6)
Name	COX6C	LAMC2	SCUBE2	SERPINA1	SERPINA5	CA12	CCND1	CELSR1	CISH	ESRP2	FASN	FHL2	FKBP4	FKBP5	FOXC1	GREB1	IGFBP4	MICB	MREG	NPY1R	OLFM1	PGR	RARA	RBBP8	SLC7A5	STC2	TFF1	TMPRSS3	TPBG	TTC39A
ORG11HS_control-1	-0.869841	0.600436	-1.12008	-0.854119	-0.656276	-1.32152	1.04565	0.671699	-0.736938	0.908703	0.0703546	1.22085	-0.272067	-0.324529	1.41194	-0.439754	0.346262	-0.795311	-1.50434	-0.478749	-0.749352	-0.367572	-0.583062	-0.226636	-0.621845	-0.698489	-0.290641	-1.11559	0.0474372	-0.391529
ORG11HS_control-2	-1.20021	-0.201719	-0.261202	-0.872703	-0.58674	0.449684	-0.694384	-0.0934062	0.870936	1.74502	1.2356	-0.668897	-0.719318	-0.746082	-0.380386	-0.420133	-0.660682	-0.91587	-0.999545	-0.546152	-0.314416	-0.350566	0.109137	-0.270428	-0.698155	-0.519294	-0.677894	-0.750299	-1.31067	-0.427628
ORG5HS_control-1	0.395424	-0.0173892	-1.02448	-0.0400463	-0.562343	1.29622	-0.724683	0.323122	-1.37273	0.059362	-0.513112	-0.411491	-0.646437	-0.912216	-0.601259	-0.428532	0.0834069	-0.678367	-0.521508	-0.55507	-0.83866	-0.389749	-1.42617	-0.618421	-1.21043	-0.617628	-0.802492	-0.862928	-0.0446784	-0.0996796
ORG5HS_control-2	-0.103793	0.226393	-0.716115	-0.151031	-0.619857	1.12305	0.41201	0.343896	-1.1905	0.700045	0.311921	0.454269	0.563128	-0.371562	-0.843981	-0.451213	0.0862372	-0.668883	-0.743703	-0.654391	-0.614234	-0.389749	-1.62169	-0.793308	-1.38765	-0.714822	-0.695647	-0.24275	-0.212709	1.00571
ORG1HS_control-1	-0.875913	-1.70849	0.816762	-1.21259	-0.322376	1.66333	-1.18732	-1.34376	-1.18786	-0.816718	1.59896	-1.28338	-0.731424	-0.63264	-1.12068	-0.353904	-1.137	1.24396	0.78331	0.334364	-0.22612	0.295826	-0.539245	-0.569075	-0.835053	0.866283	-0.925473	-0.58621	-0.376702	-1.15835
ORG1HS_control-2	-0.907907	-0.922211	-0.115397	-1.21705	1.42461	-0.0776208	-1.28436	-1.22233	-0.494114	0.107656	1.20656	-1.2377	-1.55716	0.563372	-0.711116	-0.418377	-1.76848	0.595202	-0.0850999	-0.15656	-0.685759	-0.389749	0.609994	0.0251566	0.597265	-0.204514	-0.909984	0.767517	-0.725301	-1.37044
ORG11HS_E21nM-1	-0.423359	0.851905	-0.919901	-0.743462	-0.657544	-1.63233	1.32832	0.983293	0.0939881	0.58248	-0.209532	1.51219	0.344606	-0.216015	2.24929	-0.408516	0.643344	-0.583153	-1.1062	-0.402552	-0.123934	-0.379283	-0.340223	-0.114195	-0.65298	-0.665567	-0.0315312	-1.08324	0.285757	-0.385023
ORG11HS_E21nM-2	0.125792	0.655316	0.681259	1.55772	-0.486691	-0.360665	0.0197822	0.333023	1.82966	0.160055	-0.188445	0.212359	0.127326	-0.394946	0.115081	0.0734362	0.667305	-0.771682	-0.148335	-0.402421	0.804023	-0.158196	1.69297	0.823676	1.0918	-0.321248	2.44795	0.934586	-0.964457	0.310781
ORG5HS_E21nM-1	1.05309	1.39281	-0.108912	1.21767	-0.0729963	-0.0418166	0.690685	1.21271	0.312753	-0.794467	-2.03757	0.410855	0.664751	-0.609014	0.265377	-0.2366	1.17731	-0.122807	1.26002	-0.553933	0.0438651	-0.298477	0.753731	-0.326938	0.896396	0.246871	0.48943	-0.117082	2.03122	1.30183
ORG5HS_E21nM-2	0.667899	1.18815	-0.0835538	0.62391	-0.328297	-0.0763745	1.45006	1.22668	0.784165	0.382076	-0.362746	1.32545	2.39024	-0.235873	0.368952	-0.329175	1.62801	-0.160436	0.656022	-0.345812	-0.188242	-0.364653	-0.167296	-0.802849	0.31576	0.067246	0.829933	-0.0142534	1.73453	1.81142
ORG1HS_E21nM-1	2.29554	-1.29578	2.4356	1.19993	0.317419	-0.591254	0.091919	-1.21476	0.348404	-1.84245	-0.795143	-0.57664	0.371123	2.43763	-0.85803	3.08161	-0.0106476	2.33993	1.45543	2.82294	2.83461	3.11506	0.207946	0.0277512	1.147	2.80805	0.812945	0.951069	0.161834	0.416804
ORG1HS_E21nM-2	-0.156717	-0.769412	0.416025	0.491768	2.55109	-0.430702	-1.14769	-1.22017	0.742238	-1.19176	-0.316837	-0.957859	-0.534767	1.44188	0.104814	0.33116	-1.05506	0.517415	0.953949	0.938341	0.0582172	-0.322889	1.3039	2.84527	1.3579	-0.246887	-0.2466	2.11918	-0.62626	-1.0139
