# Supplementary material for: Breast organoid suspension cultures maintain long-term estrogen receptor expression and responsiveness
Source: NPJ Breast Cancer. 2024 Dec 19;10:107. doi: 10.1038/s41523-024-00714-7 (PMC11659324; doi:10.1038/s41523-024-00714-7)
Supplement: Supplementary file 5 — Supplementary Table 5 [file 41523_2024_714_MOESM5_ESM.xlsx]

## Sheet: Heatmap data (7)
Name	VEGFA	CH507-513H4.3	CH507-513H4.6	RP11-730K11.1	RP11-323F24.5	R3HDM2	RBM19	NBEAL2	VIPR1-AS1	WASF3	CERS2	CGNL1	CHRD	PIP5K1B	AC092667.2	HCAR1	SLC7A8	PLEKHG5	PRR15	ACACB	SLC12A2	USF3	LINC01184	FAM222A	SORL1	SIGIRR	HCAR3	RP11-428L9.2	TMEM245	CBX7	TIMP4	ISYNA1	RP11-438D8.6	MIA3	CUTALP	HID1	TXNRD2	TMEM63A	PLEKHD1	GTF2I	VIPR1	PLBD1	PI4KA	FMOD	MAFB	ITGAV	MCOLN1	PSD4	ZNF460
ORG11HS_control-1	-0.878969	0.0484189	0.0484648	0.959255	1.20486	1.13901	0.297271	1.00271	0.969615	-1.00572	-0.223527	-0.522658	-0.532701	0.288463	-0.0255784	-0.342597	-0.578553	-0.0366757	-0.283834	-0.455578	-0.234443	-0.42697	-0.40708	-0.323119	-0.582728	-0.191503	-0.260639	-0.706078	-1.12254	-0.870173	-0.561428	0.526208	0.807408	0.502138	0.941212	0.181264	0.227949	0.178846	-0.426188	0.519779	0.60222	0.153612	0.376083	-0.254467	0.274168	-0.250087	0.745193	0.306079	-0.86696
ORG11HS_control-2	-0.129815	-0.523701	-0.524207	-0.260596	0.442208	0.440055	0.299609	1.01303	0.391108	0.623373	0.334258	0.211322	-0.0216153	0.483112	0.570371	0.134661	-0.173635	-0.21631	0.166072	0.272198	-0.174812	0.245	0.0274521	-0.310937	-0.157737	-0.247915	-0.0645228	-0.546299	-0.300227	0.0896539	-0.129155	-0.476542	0.818131	0.718753	1.25034	0.784027	1.1577	0.331142	0.581383	0.815574	0.125006	0.302069	0.207336	1.66696	0.799222	0.769052	0.169142	0.937706	0.845013
ORG5HS_control-1	1.25434	-0.169986	-0.169934	0.579252	0.778746	0.99763	1.23746	0.525741	1.65002	2.23284	2.3816	2.16314	2.86103	2.68097	1.89207	1.7109	1.70448	1.76472	2.21544	1.94752	2.19964	1.78299	1.94659	1.71785	1.87549	1.54145	2.05368	1.42234	1.64659	1.648	1.86897	2.06851	1.0166	1.36212	1.0901	1.19518	1.34268	1.66184	1.955	1.1085	1.51466	1.76368	1.45185	1.66761	1.87845	2.02464	1.66887	1.9166	0.602357
ORG5HS_control-2	2.08926	3.06921	3.06918	2.48557	1.44357	0.877266	1.25908	0.583904	0.908575	1.01633	0.794796	0.716572	0.529463	0.739222	0.842357	1.61393	1.72655	0.976236	1.02369	1.33762	1.08451	1.44239	1.61555	1.69507	1.63978	1.86264	1.57363	1.81009	1.416	1.75062	2.29769	0.932782	1.57313	1.012	0.587838	1.43662	1.43564	1.50587	1.47112	0.985761	1.47506	1.33746	0.743057	0.957939	0.736821	0.882042	0.785129	0.608831	2.55704
ORG1HS_control-1	-0.562666	0.115016	0.11506	-0.303566	0.720922	-0.488979	-0.686095	-1.02375	-1.22359	0.165284	0.612681	1.24268	-0.411615	-0.281219	-0.450973	0.478139	0.135897	-0.616953	-0.385642	-0.695967	-0.672186	-0.0573943	-0.884731	-0.413856	-0.3802	-0.774547	-0.419564	-0.345015	0.840808	0.181286	-0.528874	0.16556	-0.754933	-1.00119	-1.23829	-0.338402	-0.860253	-0.258252	-0.013295	-0.449538	-0.631737	-0.776145	0.0879709	-0.499595	-0.239896	-0.328384	0.515877	0.220733	0.400769
ORG1HS_control-2	0.536736	-0.232711	-0.232657	-0.575864	-0.701687	0.425149	1.41151	1.0532	-0.104798	-0.388614	-1.15207	-1.05156	-0.576645	-0.617889	-0.975296	-0.814588	-1.01403	-0.688676	-0.724367	-0.69356	-0.746504	-0.838144	-0.756989	-0.656835	-0.31419	-0.29927	-0.274731	-0.606555	-0.370061	-0.157944	-0.597768	-0.76585	-1.2162	-1.06258	-0.940014	-0.681486	-0.362903	0.125582	-0.459041	-1.108	-0.980084	-0.880658	-0.439062	-1.08855	-1.28204	-1.06879	-0.474286	-0.995379	-0.142662
ORG11HS_E21nM-1	-1.22467	-0.869985	-0.869915	-0.236541	-0.663361	0.469531	-0.0823323	0.507003	0.0810658	-1.00322	-0.543766	-0.649193	-0.543834	-0.334701	-0.916163	-0.562365	-0.658267	-0.483155	-0.380371	-0.312101	-0.28451	-0.539655	-0.575749	-0.572895	-0.679678	-0.631221	-0.750013	-0.824104	-1.01503	-1.31933	-0.57677	-0.0176096	0.682158	0.646398	0.543413	-0.510756	-0.496052	-0.109831	-0.213176	0.0710267	0.107921	0.460187	0.366525	-0.500797	-0.346764	-0.315176	-0.194777	-0.166811	-0.378026
ORG11HS_E21nM-2	-1.05862	-0.297472	-0.297417	-0.821358	-1.38311	0.0370153	-0.36985	-0.588199	-0.959111	-0.507697	-0.547317	-0.766185	-0.279926	-0.375034	-1.09345	-0.736806	-0.623069	-0.755994	-0.424412	-0.27239	-0.635227	-0.434377	-0.37789	-0.595044	-0.764597	-0.904487	-0.777554	-0.934057	-0.94326	-1.08229	-0.387774	-1.12681	-0.174126	0.303873	0.94437	-0.354187	0.3991	-0.898668	-0.230399	-0.321903	-0.539948	-0.494119	-0.45973	0.43719	-0.00429518	0.102287	0.0516248	0.295597	-0.218095
ORG5HS_E21nM-1	-0.146197	-0.351881	-0.351824	0.0673009	-0.504027	-0.358681	0.224202	0.0534933	0.856105	0.691292	0.271085	0.166647	0.501419	-0.207061	1.099	0.147201	0.453433	1.46985	0.744906	0.827757	1.04363	0.892742	0.58917	0.746997	0.675993	0.273449	-0.0575772	1.27288	0.73859	0.459106	-0.186319	0.397219	0.0810061	0.316083	-0.340547	-0.430862	-0.196683	0.0171896	-0.241937	0.540604	0.527677	0.376658	0.525306	0.127591	0.592986	0.95323	-0.0574686	0.0205889	-0.691079
ORG5HS_E21nM-2	0.718788	-0.209091	-0.209039	0.241676	-0.364648	-0.607917	-0.522299	0.149225	-0.100112	-0.0190574	0.122359	0.123884	-0.0277794	-0.382944	0.6678	0.792167	0.922996	0.792612	0.499711	0.504891	0.426892	0.359491	0.68262	0.878015	0.653663	1.18893	0.817013	0.689289	0.644765	0.537581	0.0184611	0.654162	-0.21099	0.160037	-0.307974	1.42793	0.287346	0.451612	0.361704	0.994672	0.581338	0.481652	0.762804	-0.285013	0.324776	-0.271767	0.355147	-0.0395874	-0.35045
ORG1HS_E21nM-1	-0.705341	-0.405547	-0.405489	-1.03871	0.616997	-2.54012	-1.71807	-1.95304	-1.49286	-0.776021	-0.872098	-0.341988	-0.748647	-0.822655	-0.455123	-1.24427	-0.8336	-1.06077	-1.47927	-1.35751	-1.24942	-1.68385	-1.10737	-1.17374	-1.38475	-0.836955	-1.39541	-0.545006	-0.888639	-0.950013	-0.608515	-0.957056	-1.04956	-1.80347	-1.25231	-1.35813	-1.32615	-1.82408	-1.63419	-1.75498	-1.35636	-1.54512	-2.1206	-1.11734	-1.05029	-1.31485	-1.80135	-1.61445	-1.11985
ORG1HS_E21nM-2	0.107157	-0.172273	-0.172221	-1.09642	-1.59047	-0.389959	-1.35049	-1.32332	-0.976023	-1.02879	-1.17801	-1.29265	-0.749148	-1.17026	-1.15502	-1.17637	-1.0622	-1.14489	-0.971932	-1.10288	-0.757564	-0.742215	-0.751578	-0.991496	-0.581045	-0.980572	-0.444308	-0.68748	-0.646994	-0.286507	-0.608515	-1.40057	-1.57263	-1.15416	-1.27815	-1.3512	-1.60838	-1.18125	-1.15098	-1.40149	-1.42575	-1.17927	-1.50153	-1.11153	-1.68314	-1.18219	-1.76311	-1.48992	-0.638057
[truncated: 422 more columns]
